# Supplementary material for: Prevalence of Drug-Resistant Tuberculosis in Sudan: A Systematic Review and Meta-Analysis
Source: MDPI journal article supplement (doi:10.3390/antibiotics10080932), 2021-07-31
Supplement: s1 [file s1]

A

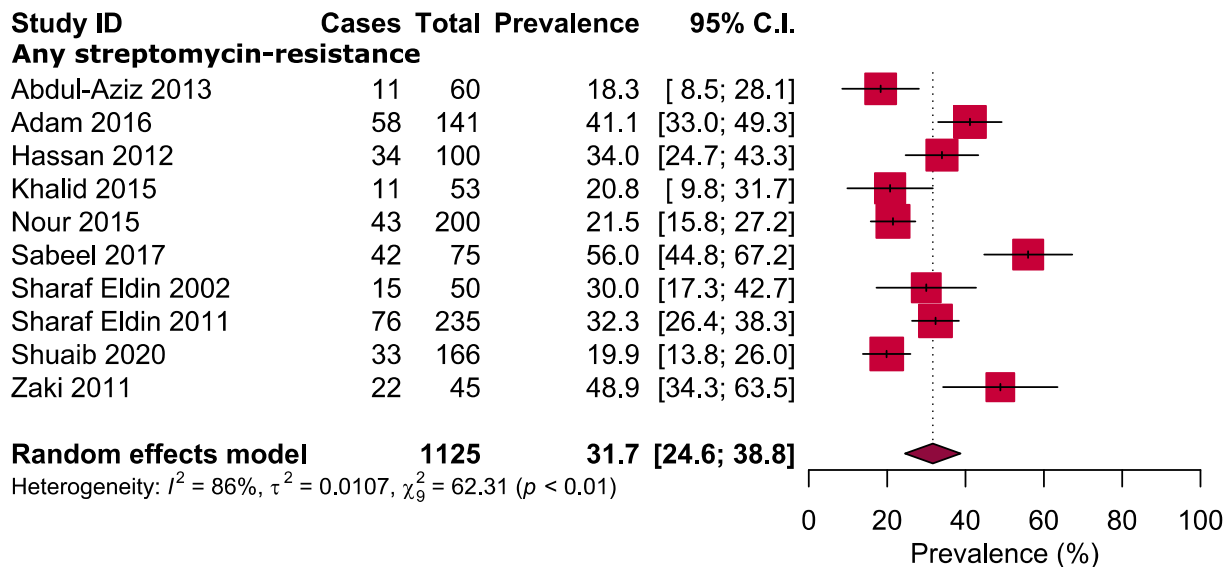

B

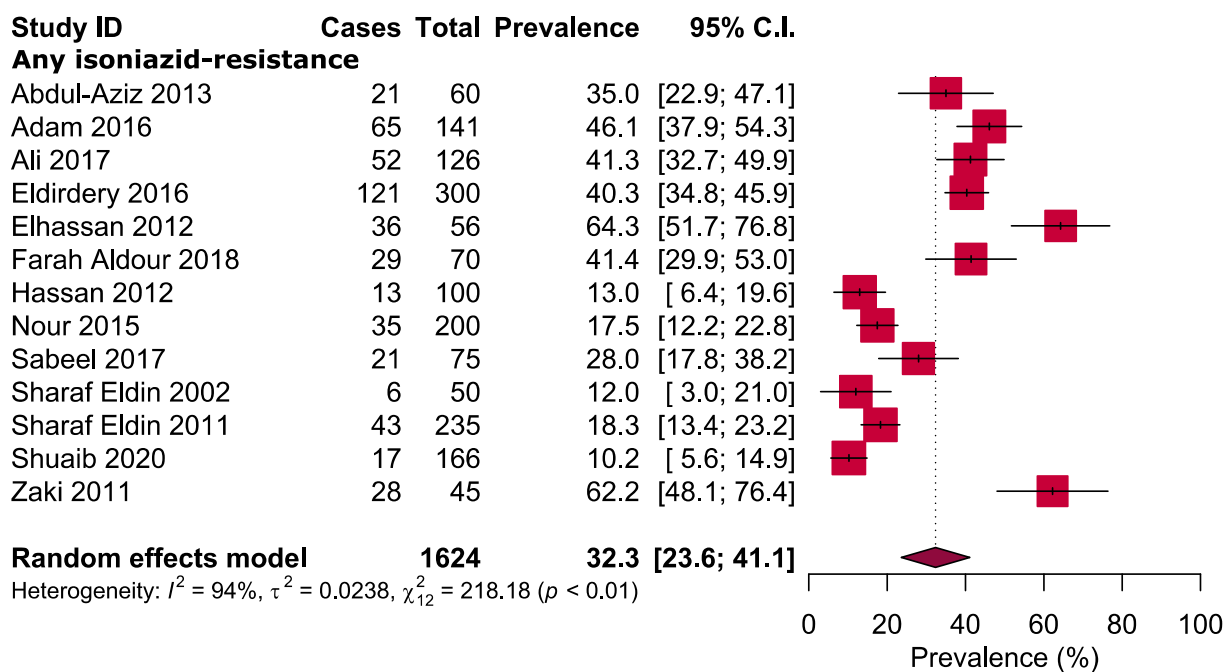

C

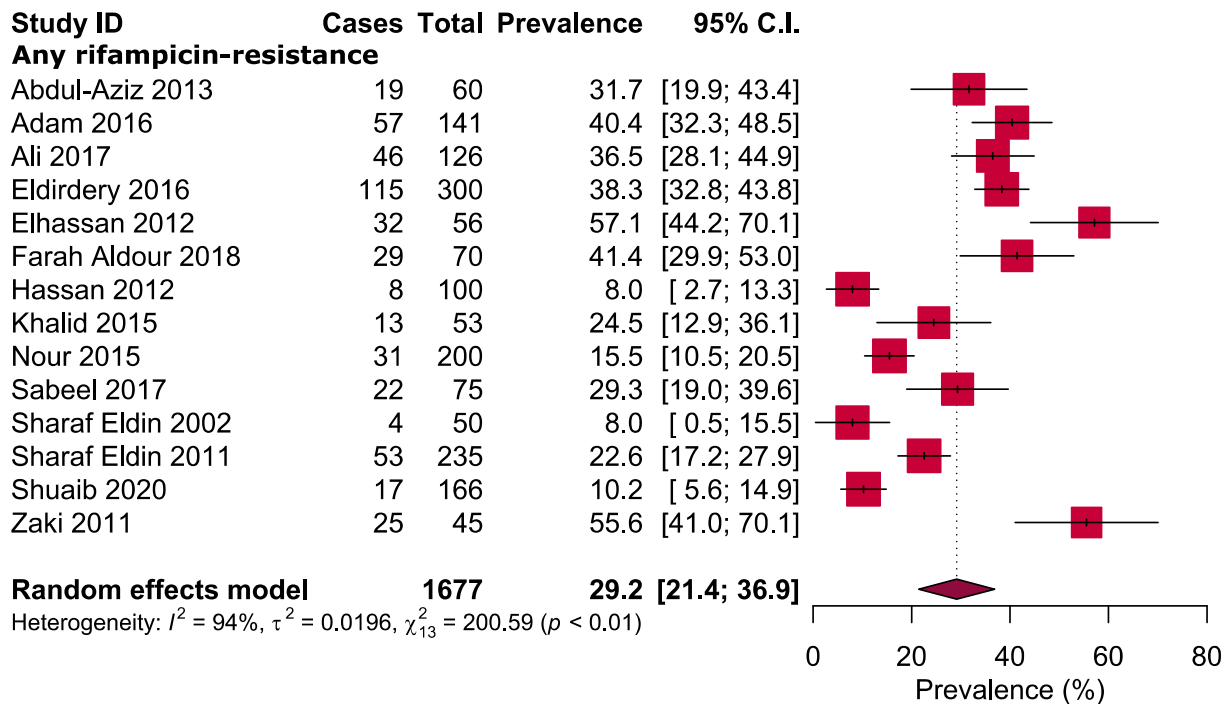

D

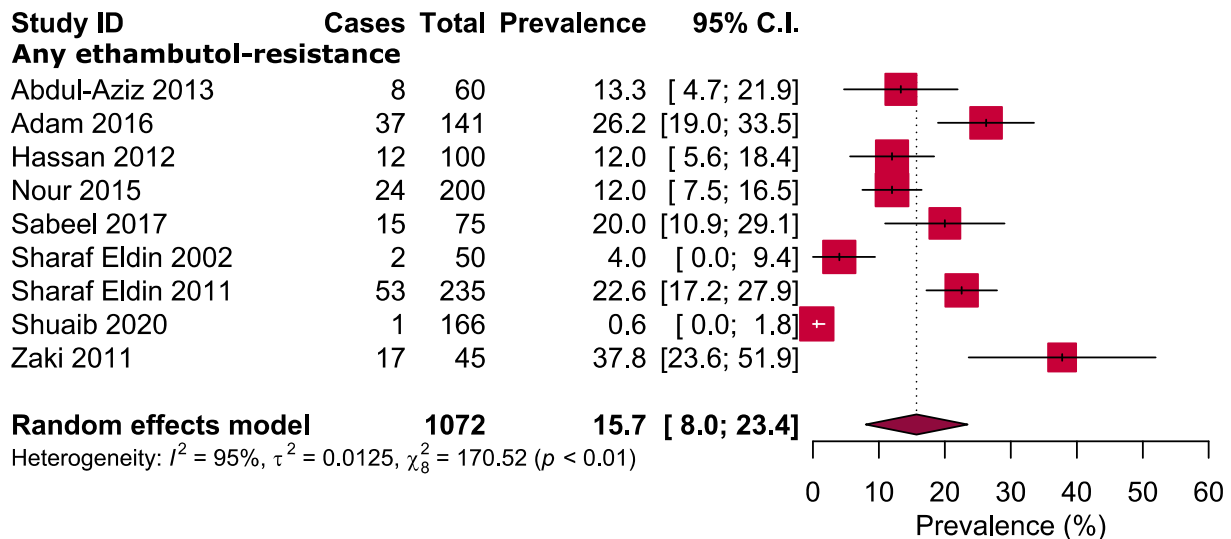

E

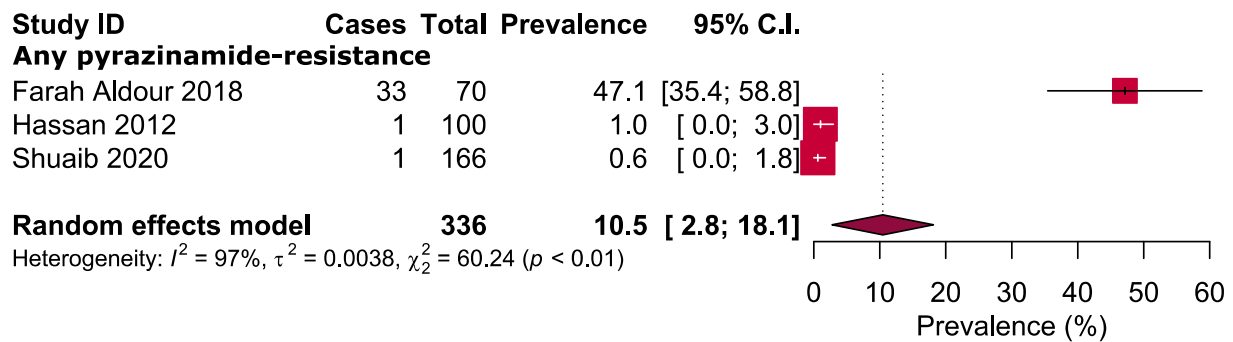

F

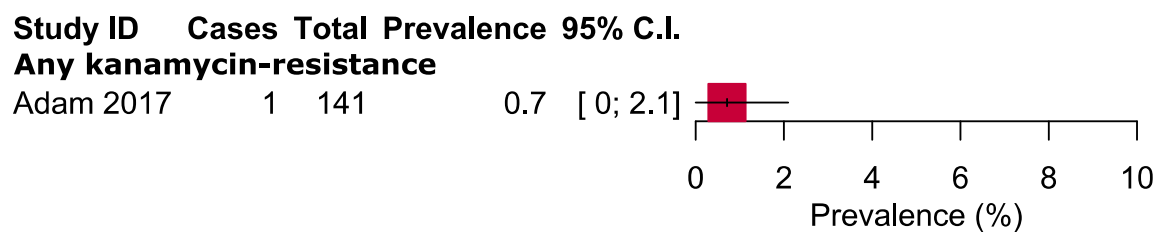

G

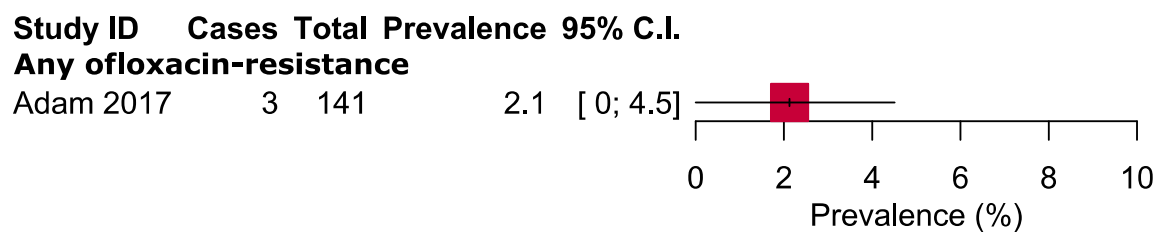

**Figure S1.** Any resistance to first- and second-line anti-TB drugs: A) streptomycin, B) isoniazid, C) rifampicin, D) ethambutol, E) pyrazinamide, F) kanamycin, and G) ofloxacin.

A

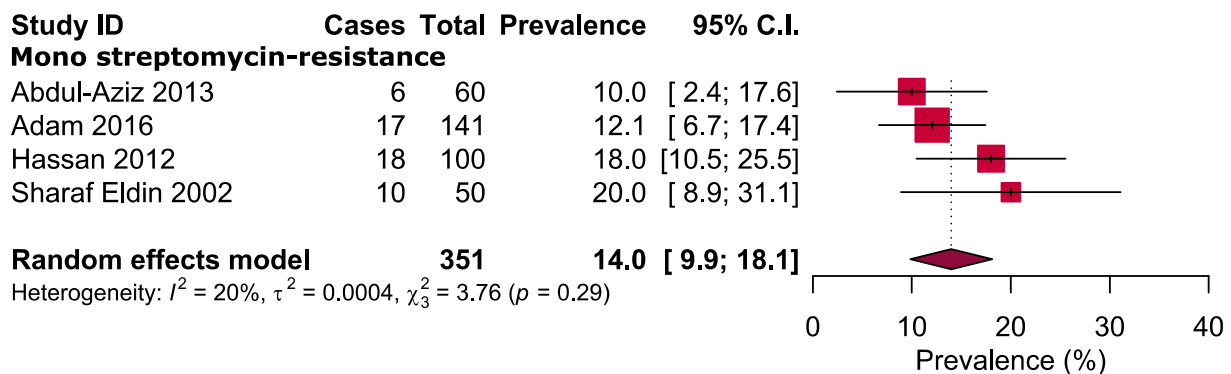

**B**

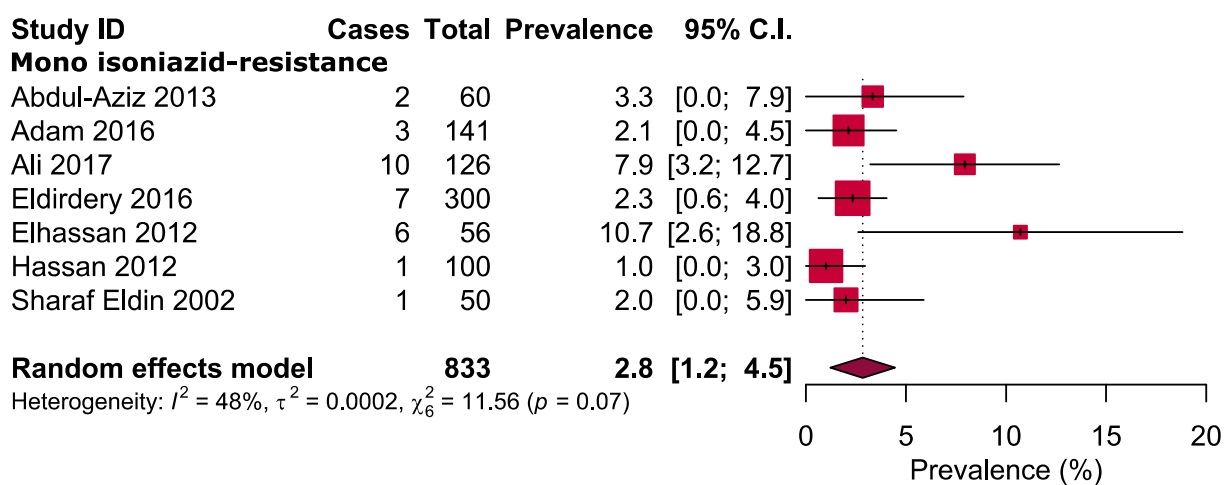

**C**

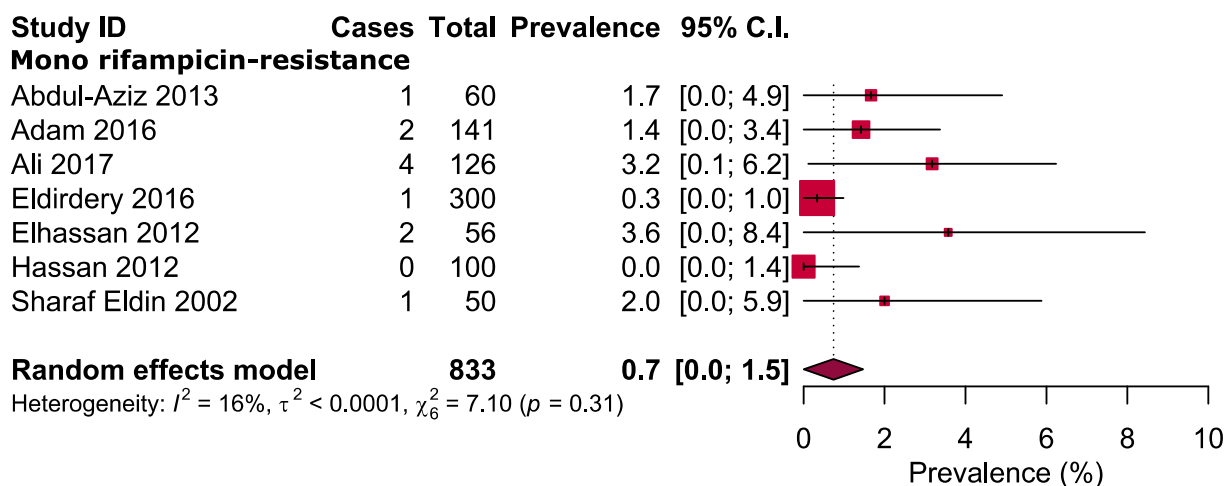

**D**

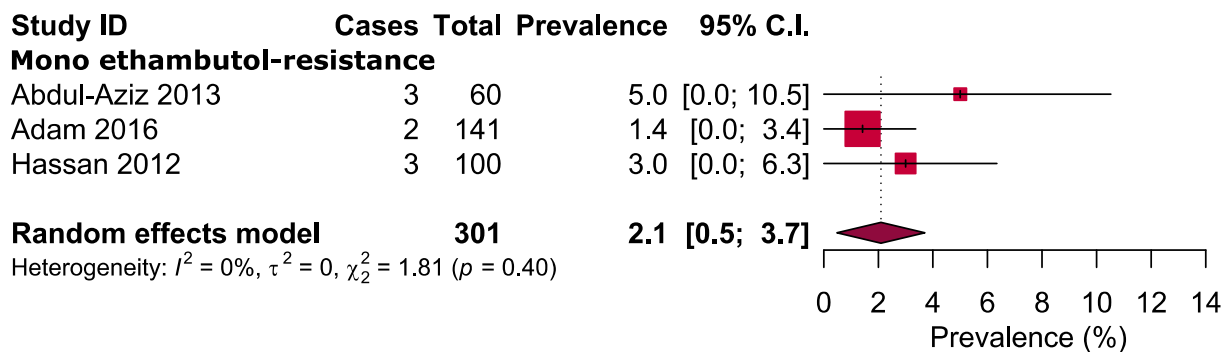

**Figure S2.** Mono resistance to anti-TB drugs: A) streptomycin, B) isoniazid, C) rifampicin, and D) ethambutol.

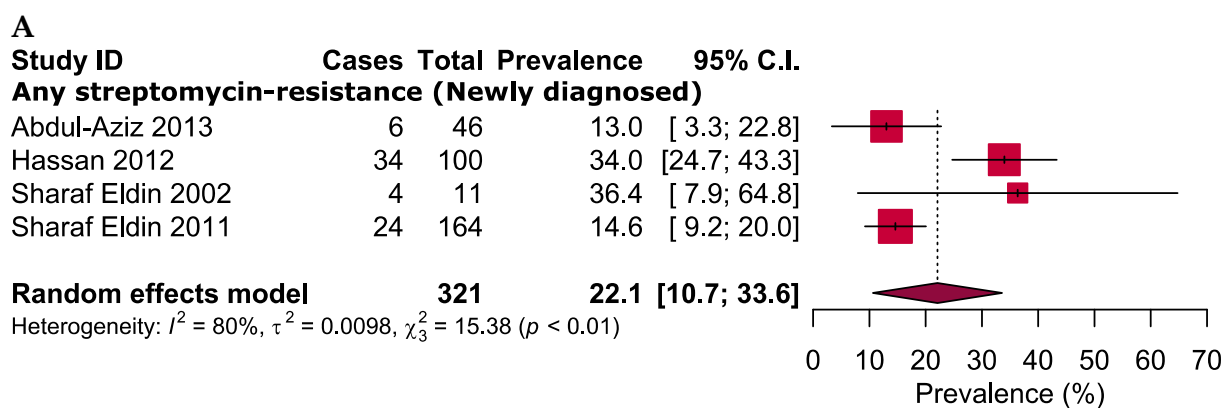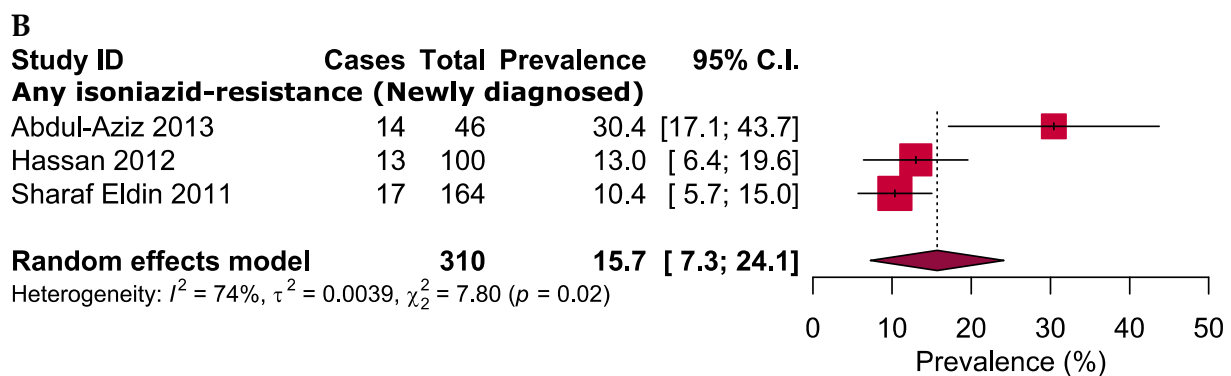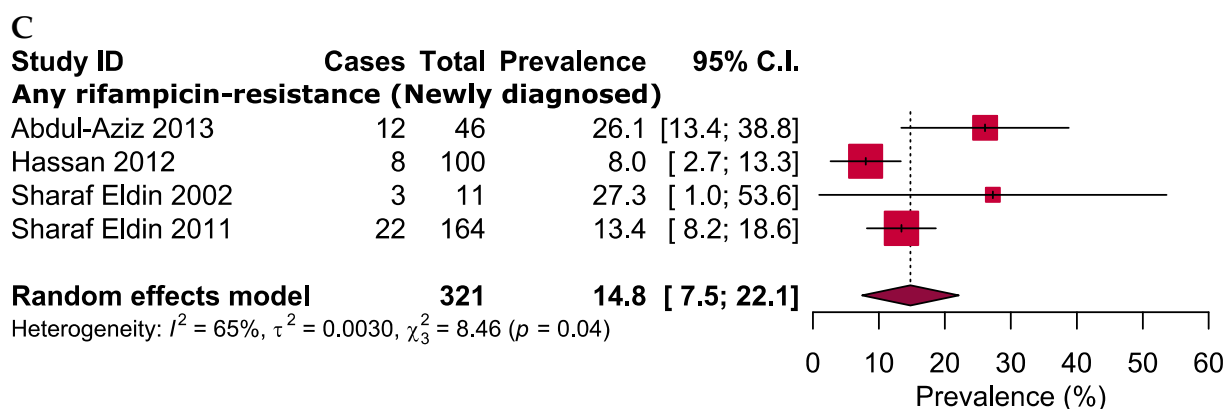

D

**Study ID** **Cases** **Total** **Prevalence** **95% C.I.**

**Any ethambutol-resistance (Newly diagnosed)**

Abdul-Aziz 2013 4 46 8.7 [0.6; 16.8]

Hassan 2012 12 100 12.0 [5.6; 18.4]

Sharaf Eldin 2011 9 164 5.5 [2.0; 9.0]

**Random effects model** **310** **7.9 [3.8; 12.1]**

Heterogeneity:  $I^2 = 38\%$ ,  $\tau^2 = 0.0005$ ,  $\chi^2_2 = 3.24$  ( $p = 0.20$ )

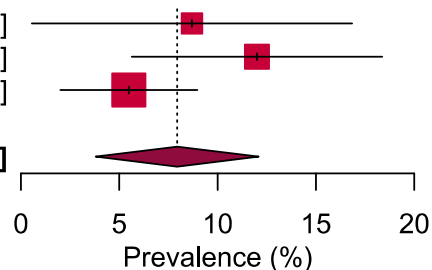

E

**Study ID** **Cases** **Total** **Prevalence** **95% C.I.**

**Any pyrazinamide-resistance (Newly diagnosed)**

Hassan 2012 1 100 1.0 [0; 3]

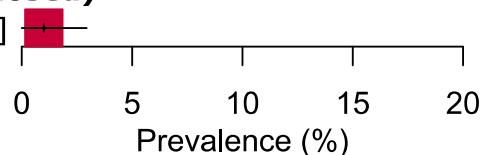

F

F

**Study ID** **Cases** **Total** **Prevalence** **95% C.I.**

**Any streptomycin-resistance (Previously treated)**

Abdul-Aziz 2013 5 14 35.7 [10.6; 60.8]

Adam 2016 58 141 41.1 [33.0; 49.3]

Sharaf Eldin 2011 52 71 73.2 [62.9; 83.5]

**Random effects model** **226** **51.1 [26.1; 76.1]**

Heterogeneity:  $I^2 = 92\%$ ,  $\tau^2 = 0.0427$ ,  $\chi^2_2 = 24.82$  ( $p < 0.01$ )

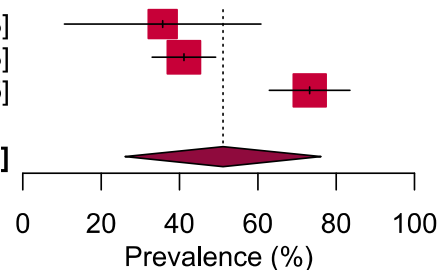

G

**Study ID** **Cases** **Total** **Prevalence** **95% C.I.**

**Any isoniazid-resistance (Previously treated)**

Abdul-Aziz 2013 7 14 50.0 [23.8; 76.2]

Adam 2016 65 141 46.1 [37.9; 54.3]

Farah Aldour 2018 29 70 41.4 [29.9; 53.0]

Sharaf Eldin 2011 26 71 36.6 [25.4; 47.8]

**Random effects model** **296** **42.8 [37.2; 48.4]**

Heterogeneity:  $I^2 = 0\%$ ,  $\tau^2 = 0$ ,  $\chi^2_3 = 2.13$  ( $p = 0.55$ )

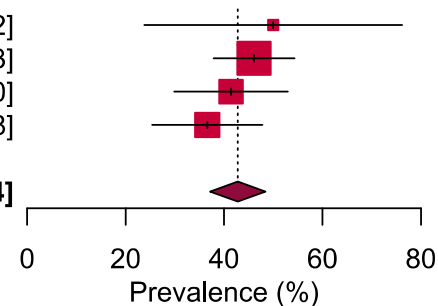

H

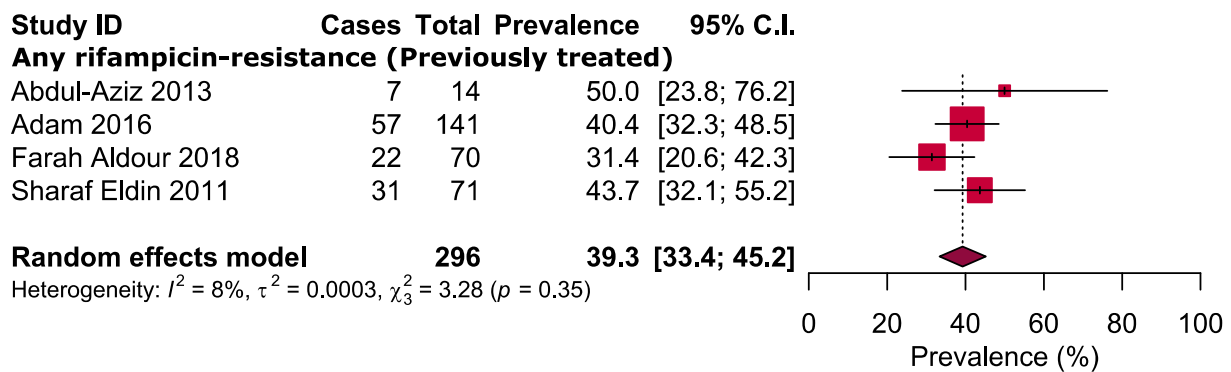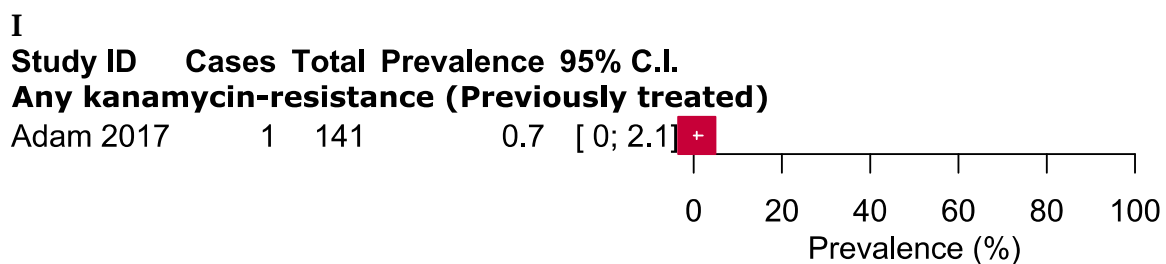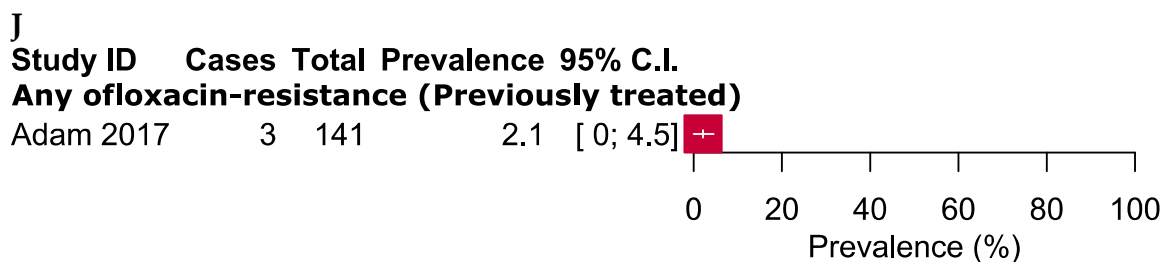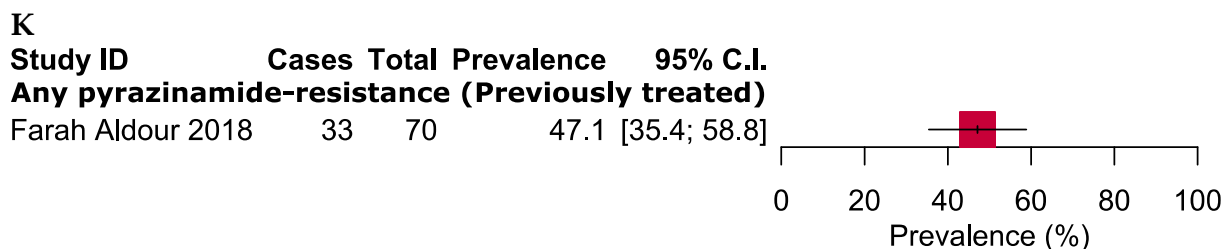

**Figure S3.** Any resistance to anti-TB drugs in newly diagnosed patients: A) streptomycin B) isoniazid, C) rifampicin, D) ethambutol, and E) pyrazinamide, and any resistance to anti-TB drugs in previously treated patients: F) streptomycin, G) isoniazid, H) rifampicin, I) kanamycin, J) ofloxacin, and K) pyrazinamide.

**A**

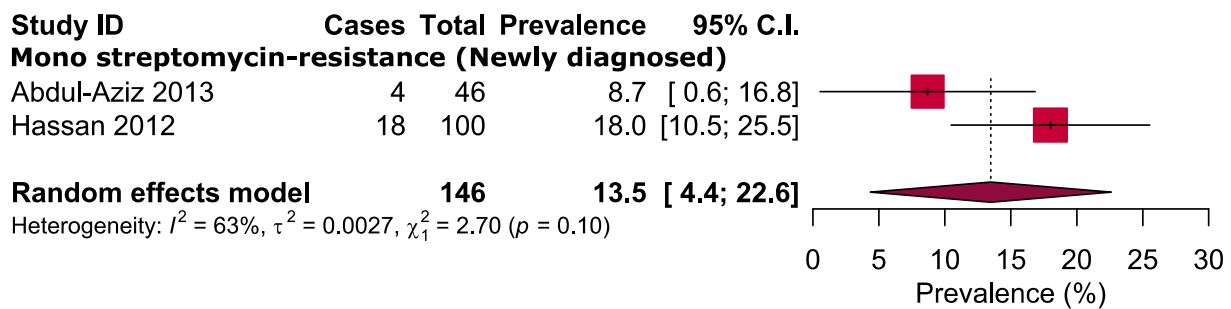

**B**

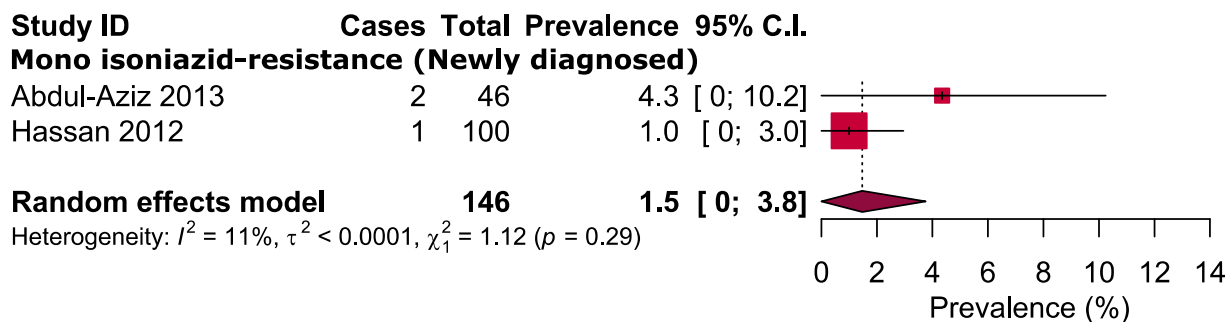

**C**

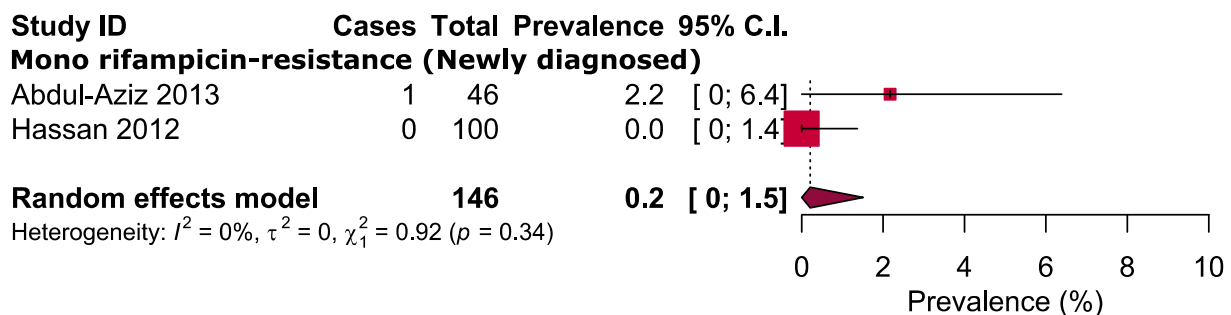

**D**

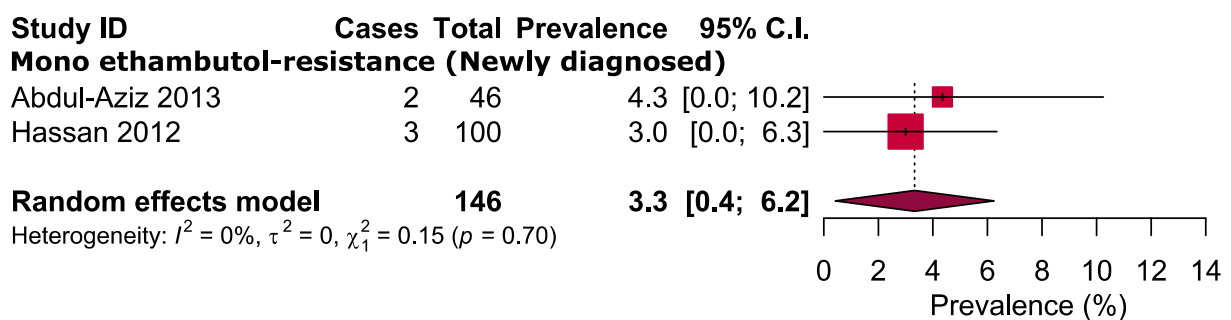

**E**



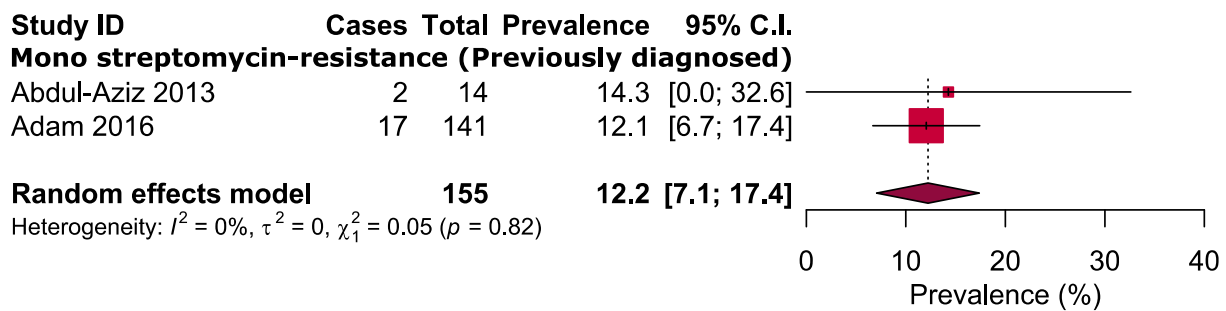

F

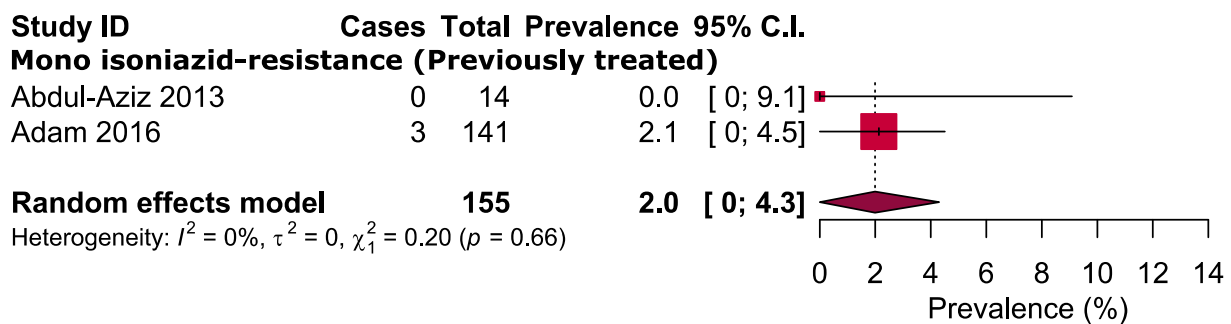

G

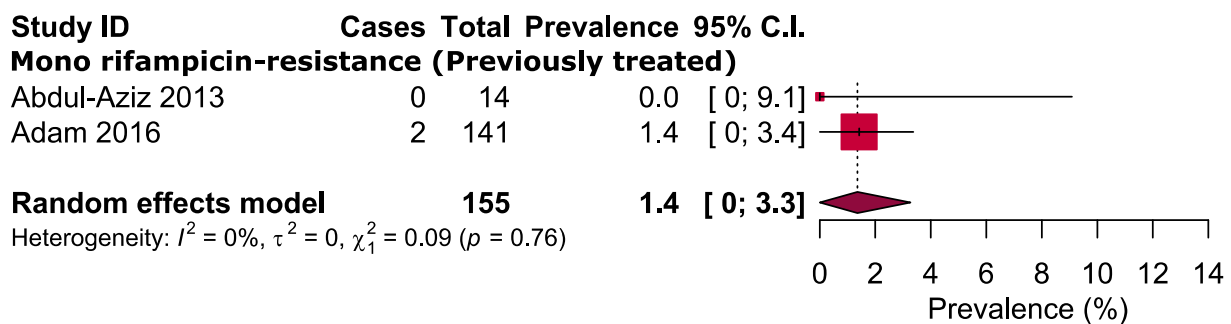

H

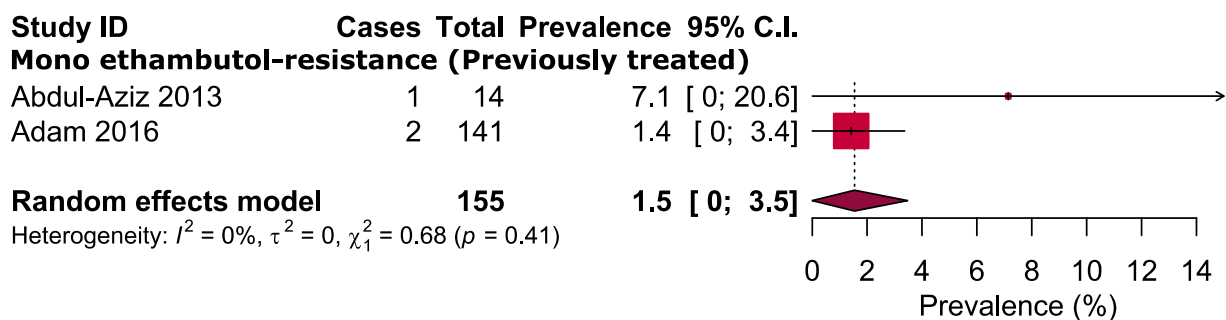

**Figure S4.** Mono resistance to anti-TB drugs in newly diagnosed patients: A) streptomycin, B) isoniazid, C) rifampicin, and D) ethambutol and mono resistance to anti-

TB drugs in previously treated patients: E) streptomycin, F) isoniazid, G) rifampicin, and H) ethambutol.

**A**

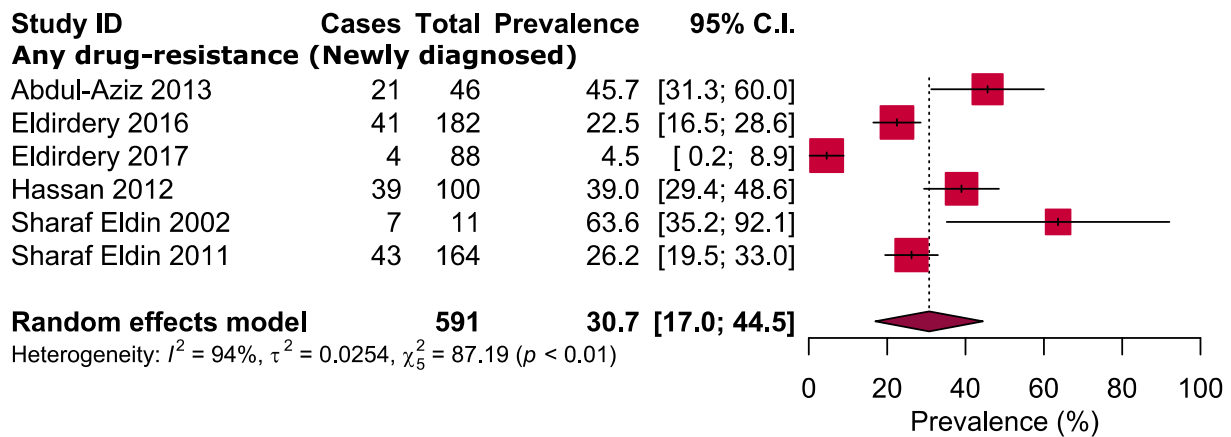

**B**

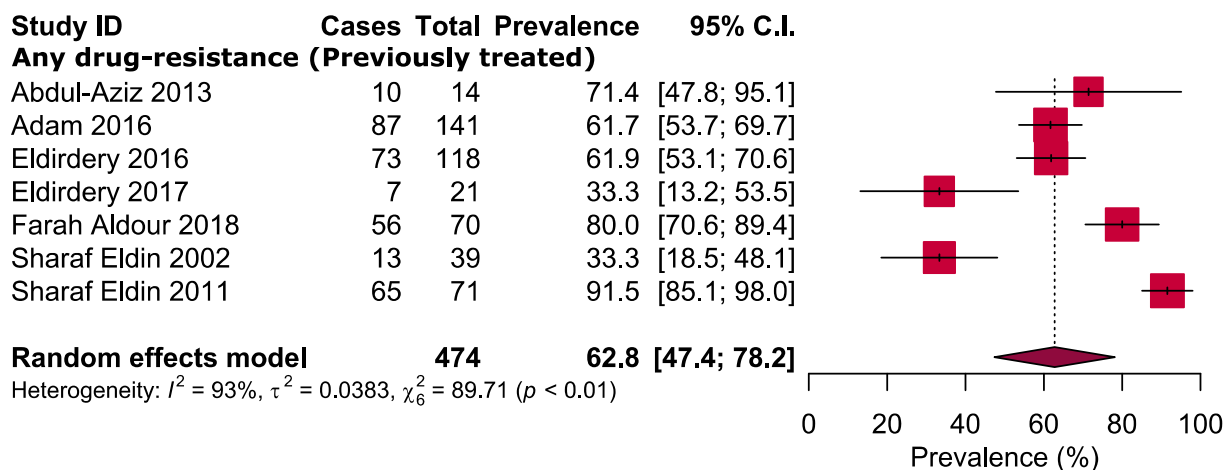

**C**

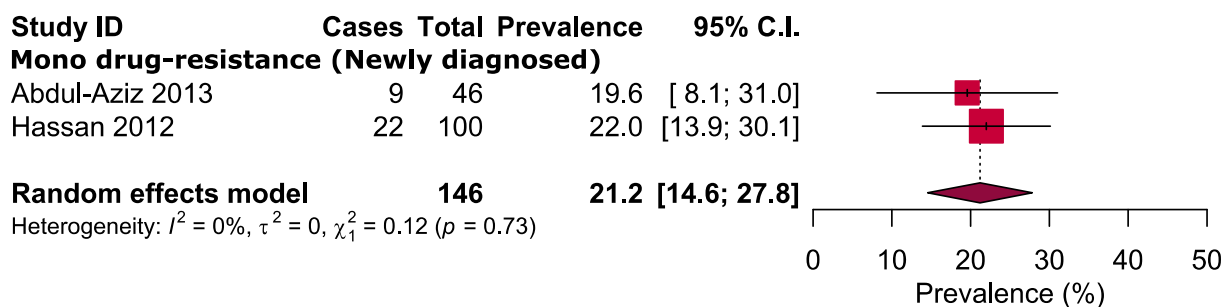

D

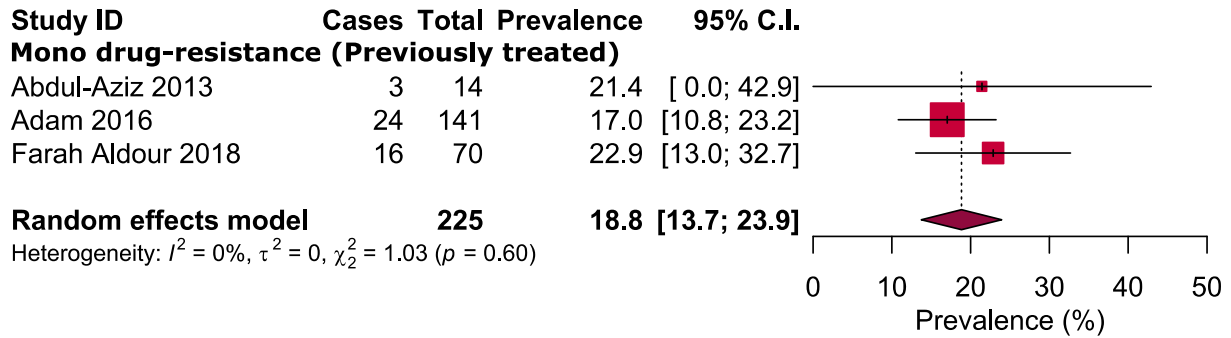

E

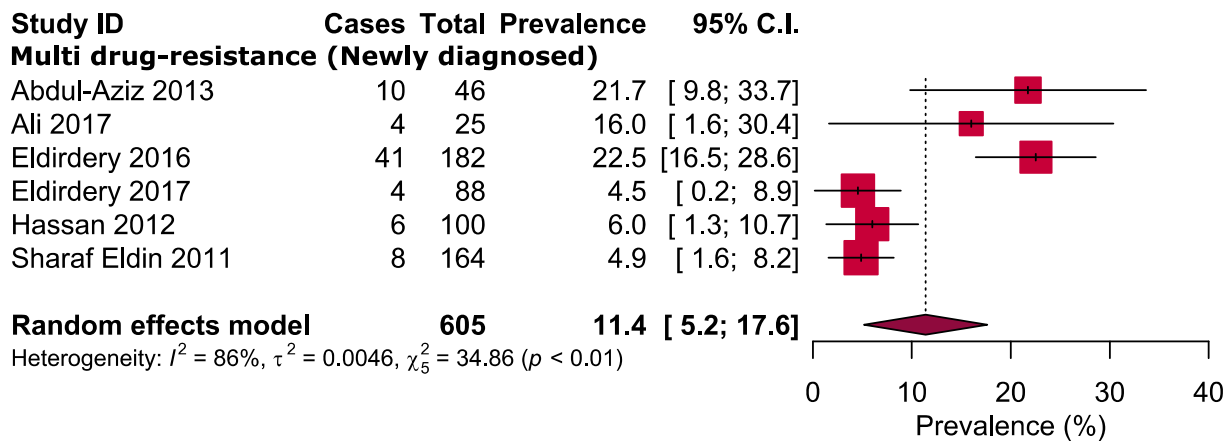

F

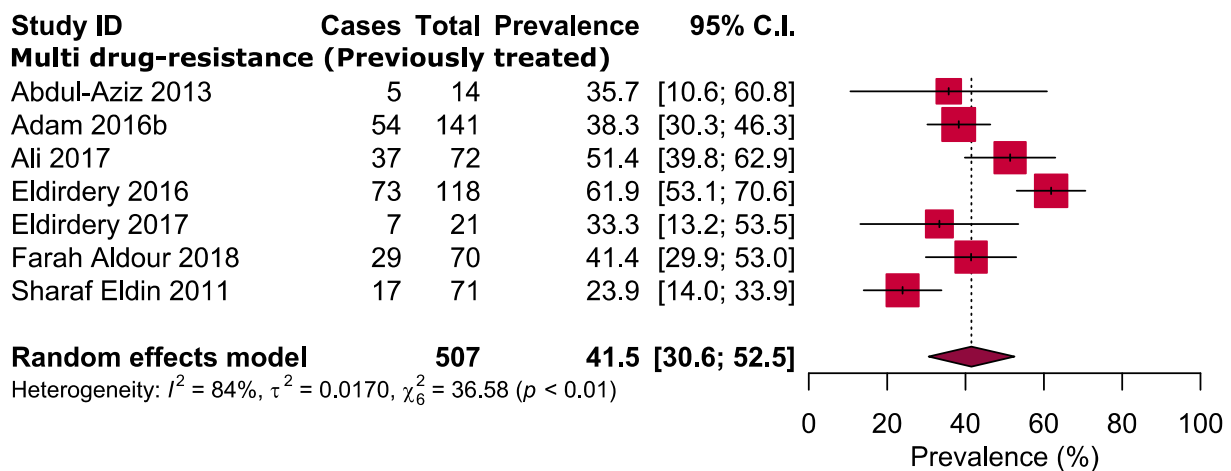

G

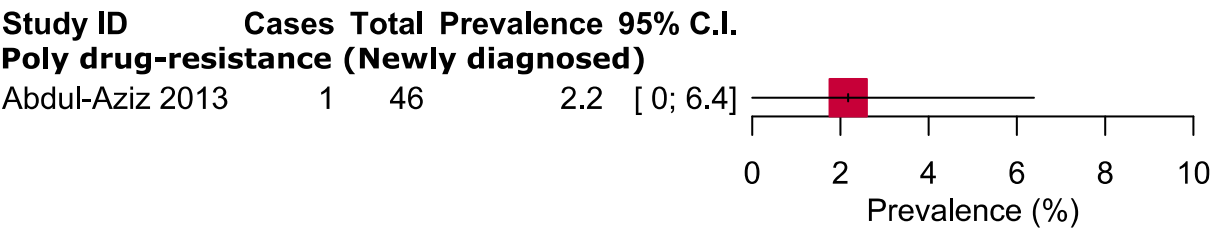

H

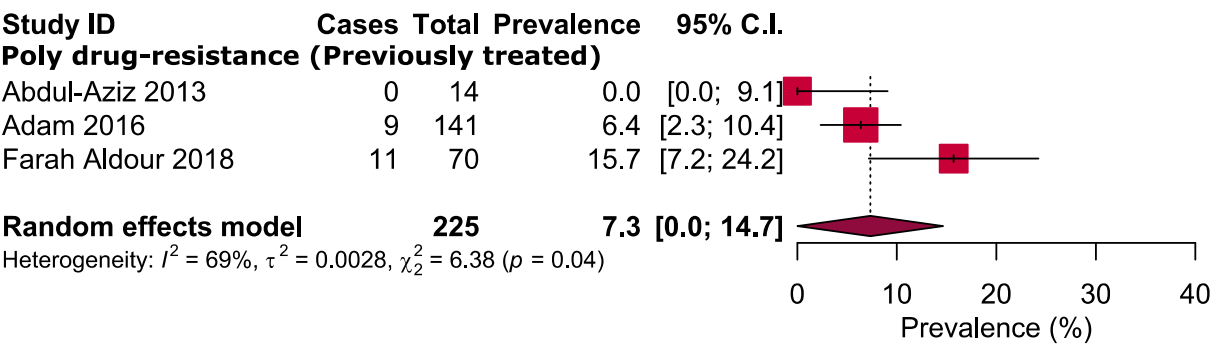

**Figure S5.** Overall drug resistance (DR) in newly diagnosed and previously treated TB patients. A) Any-DR in newly diagnosed patients, B) any-DR in previously treated patients, C) mono-DR in newly diagnosed patients, D) mono-DR in previously treated patients, E) multi-DR in newly diagnosed patients, F) multi-DR in previously treated patients, G) poly-DR in newly diagnosed patients, and H) poly-DR in previously treated patients.

A

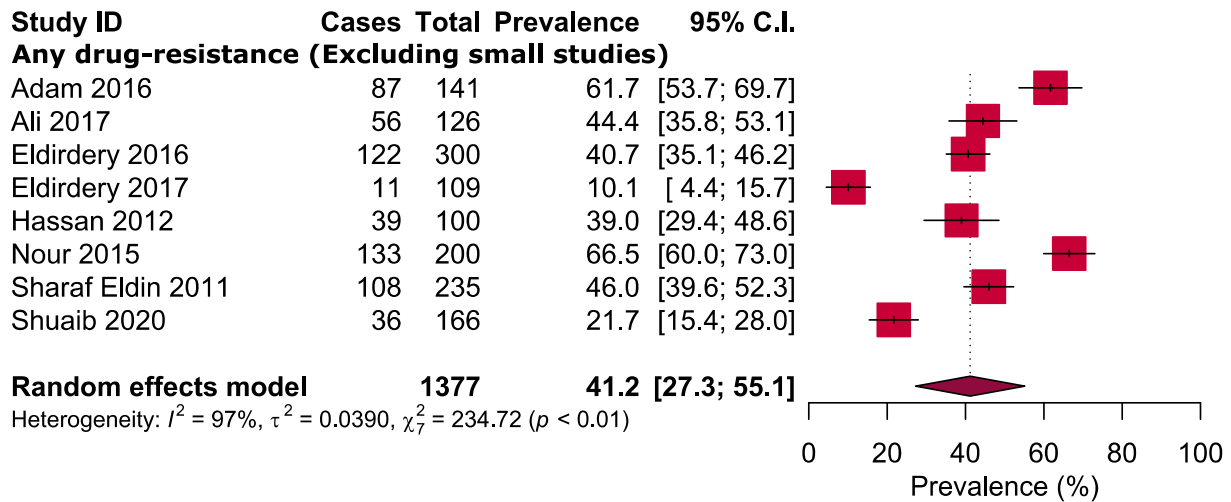

**B**

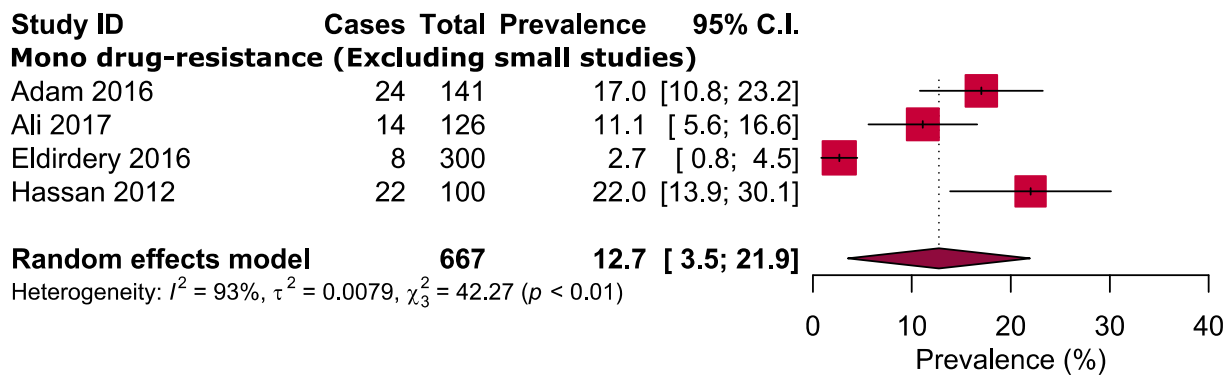

**C**

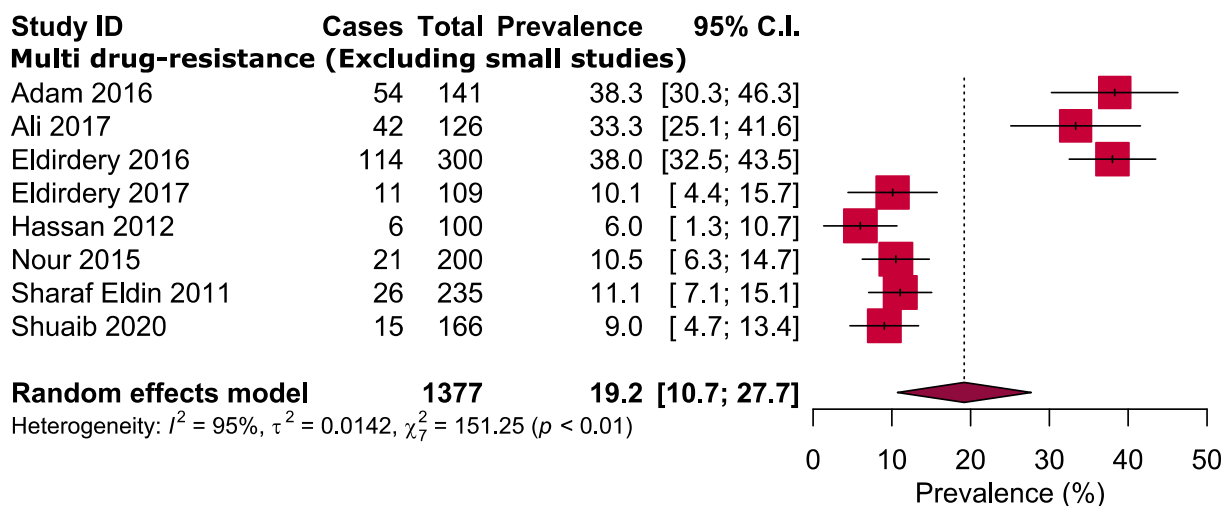

**D**

**Study ID Cases Total Prevalence 95% C.I.**

**Poly drug-resistance (Excluding small studies)**

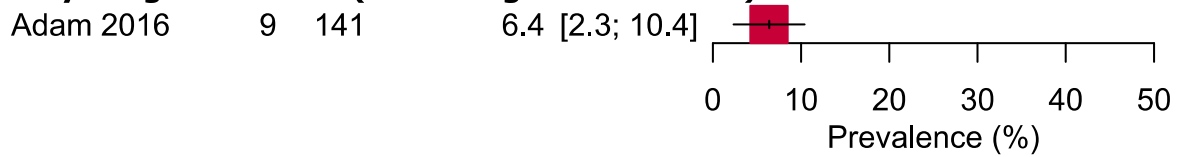

E

**Study ID Cases Total Prevalence 95% C.I.**

**Extensively drug-resistance (Excluding small studies)**

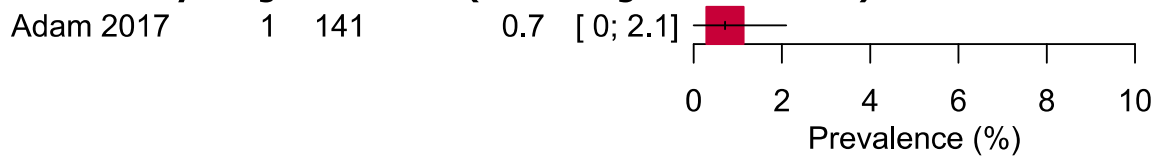

F

**Study ID Cases Total Prevalence 95% C.I.**  
**Any drug-resistance (Excluding moderate quality studies)**

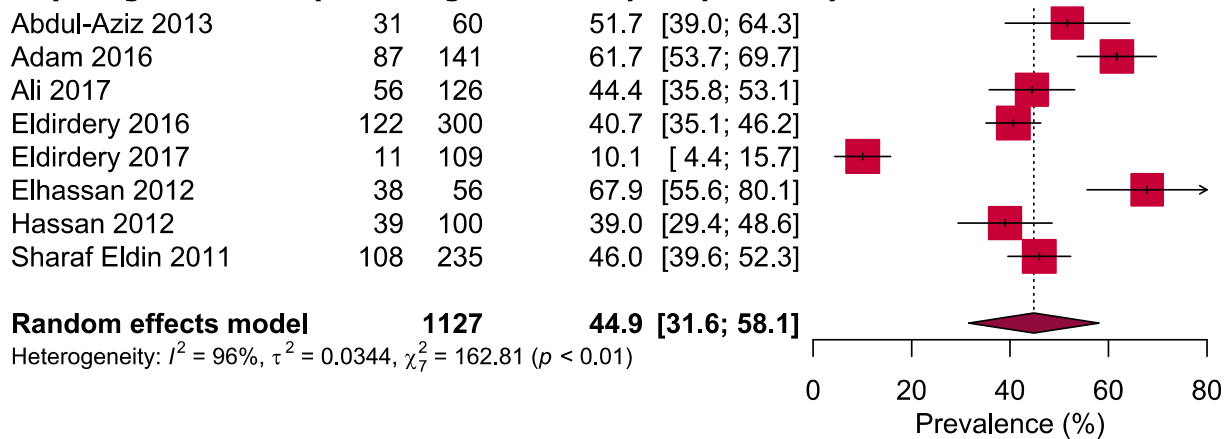

G

**Study ID Cases Total Prevalence 95% C.I.**  
**Mono drug-resistance (Excluding moderate quality studies)**

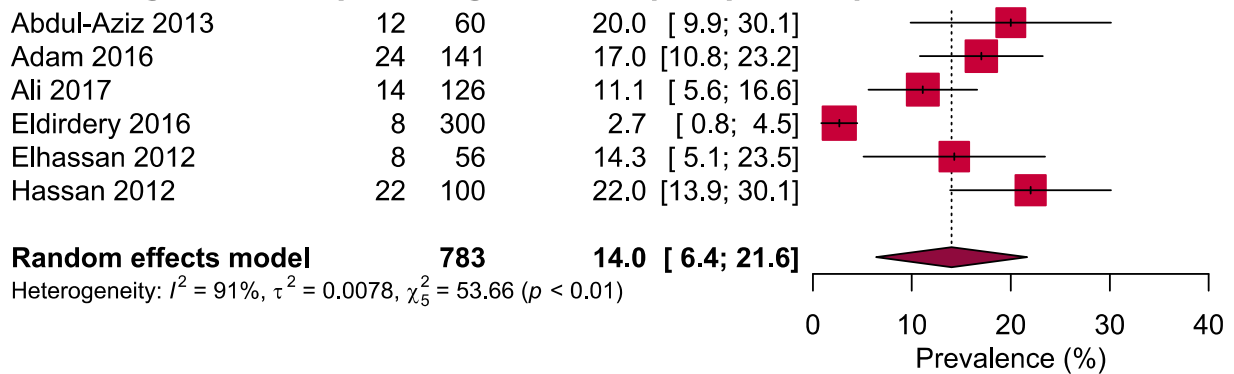

H

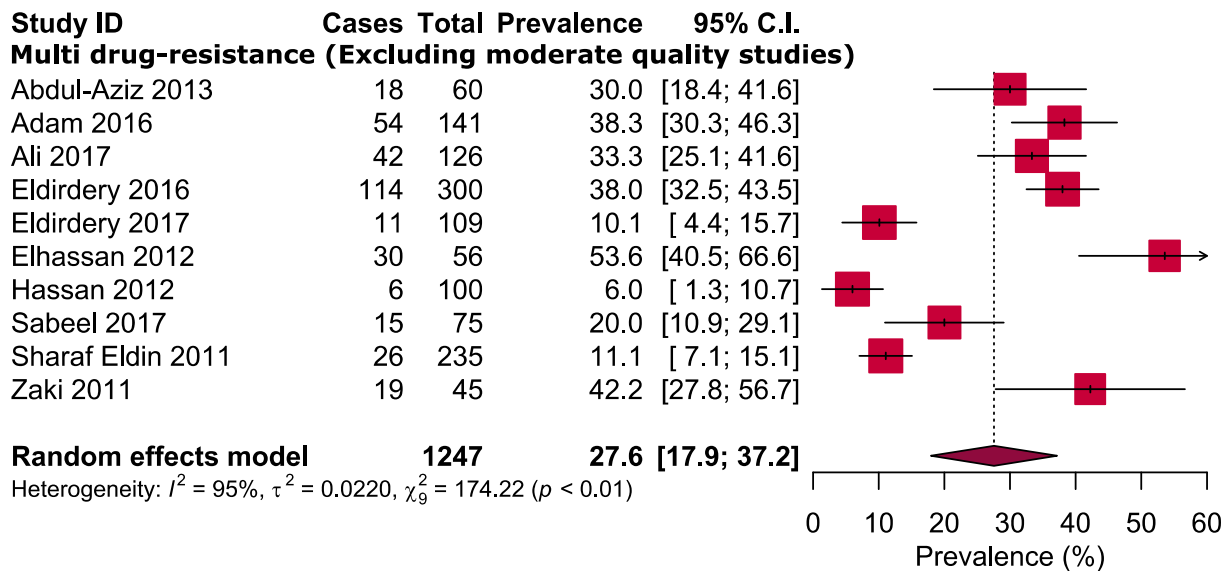

I

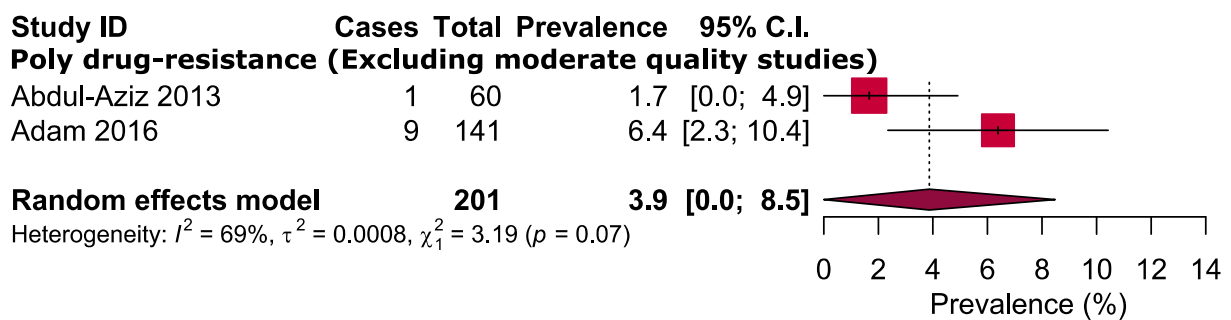

J

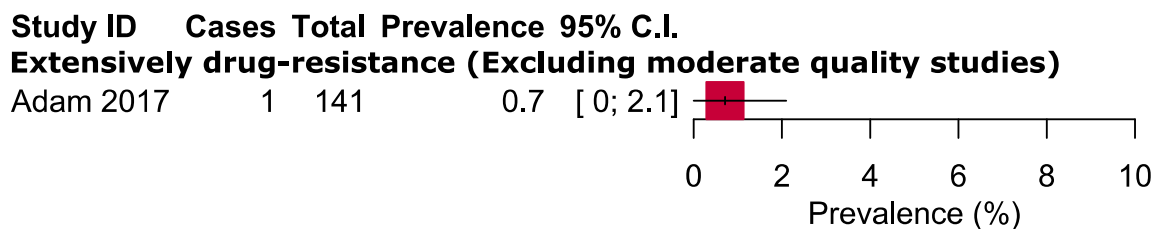

K

**Study ID**                      **Cases** **Total** **Prevalence**      **95% C.I.**  
**Any drug-resistance (Using a fixed-effects model)**

|                   |     |     |      |              |
|-------------------|-----|-----|------|--------------|
| Abdul-Aziz 2013   | 31  | 60  | 51.7 | [39.0; 64.3] |
| Adam 2016         | 87  | 141 | 61.7 | [53.7; 69.7] |
| Ali 2017          | 56  | 126 | 44.4 | [35.8; 53.1] |
| Eldirdery 2016    | 122 | 300 | 40.7 | [35.1; 46.2] |
| Eldirdery 2017    | 11  | 109 | 10.1 | [ 4.4; 15.7] |
| Elhassan 2012     | 38  | 56  | 67.9 | [55.6; 80.1] |
| Farah Aldour 2018 | 56  | 70  | 80.0 | [70.6; 89.4] |
| Hassan 2012       | 39  | 100 | 39.0 | [29.4; 48.6] |
| Khalid 2015       | 23  | 53  | 43.4 | [30.1; 56.7] |
| Nour 2015         | 133 | 200 | 66.5 | [60.0; 73.0] |
| Sharaf Eldin 2002 | 20  | 50  | 40.0 | [26.4; 53.6] |
| Sharaf Eldin 2011 | 108 | 235 | 46.0 | [39.6; 52.3] |
| Shuaib 2020       | 36  | 166 | 21.7 | [15.4; 28.0] |

**Fixed effect model**                      **1666**                      **42.4 [40.2; 44.6]**

**Random effects model**                      **47.0 [35.5; 58.6]**

Heterogeneity:  $I^2 = 96\%$ ,  $\tau^2 = 0.0428$ ,  $\chi^2_{12} = 324.67$  ( $p < 0.01$ )

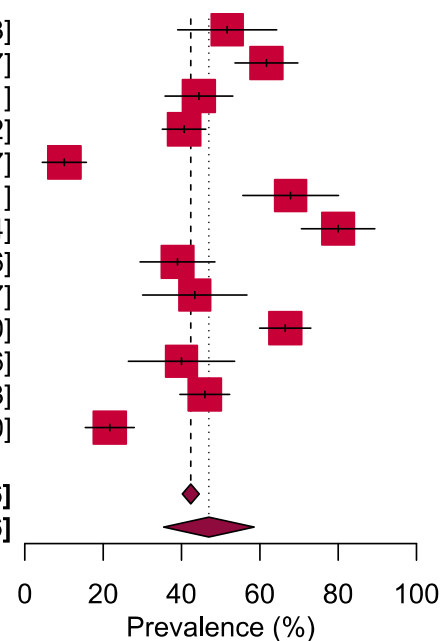

**L**

**Study ID**                      **Cases** **Total** **Prevalence**      **95% C.I.**  
**Mono drug-resistance (Using a fixed-effects model)**

|                   |    |     |      |              |
|-------------------|----|-----|------|--------------|
| Abdul-Aziz 2013   | 12 | 60  | 20.0 | [ 9.9; 30.1] |
| Adam 2016         | 24 | 141 | 17.0 | [10.8; 23.2] |
| Ali 2017          | 14 | 126 | 11.1 | [ 5.6; 16.6] |
| Eldirdery 2016    | 8  | 300 | 2.7  | [ 0.8; 4.5]  |
| Elhassan 2012     | 8  | 56  | 14.3 | [ 5.1; 23.5] |
| Farah Aldour 2018 | 16 | 70  | 22.9 | [13.0; 32.7] |
| Hassan 2012       | 22 | 100 | 22.0 | [13.9; 30.1] |
| Sharaf Eldin 2002 | 12 | 50  | 24.0 | [12.2; 35.8] |

**Fixed effect model**                      **903**                      **6.6 [ 5.0; 8.1]**

**Random effects model**                      **16.2 [ 9.0; 23.4]**

Heterogeneity:  $I^2 = 90\%$ ,  $\tau^2 = 0.0091$ ,  $\chi^2_7 = 73.36$  ( $p < 0.01$ )

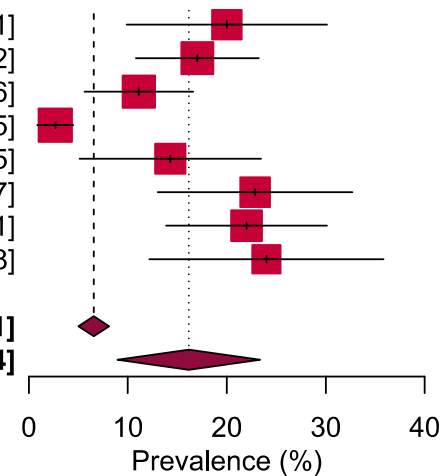

**M**



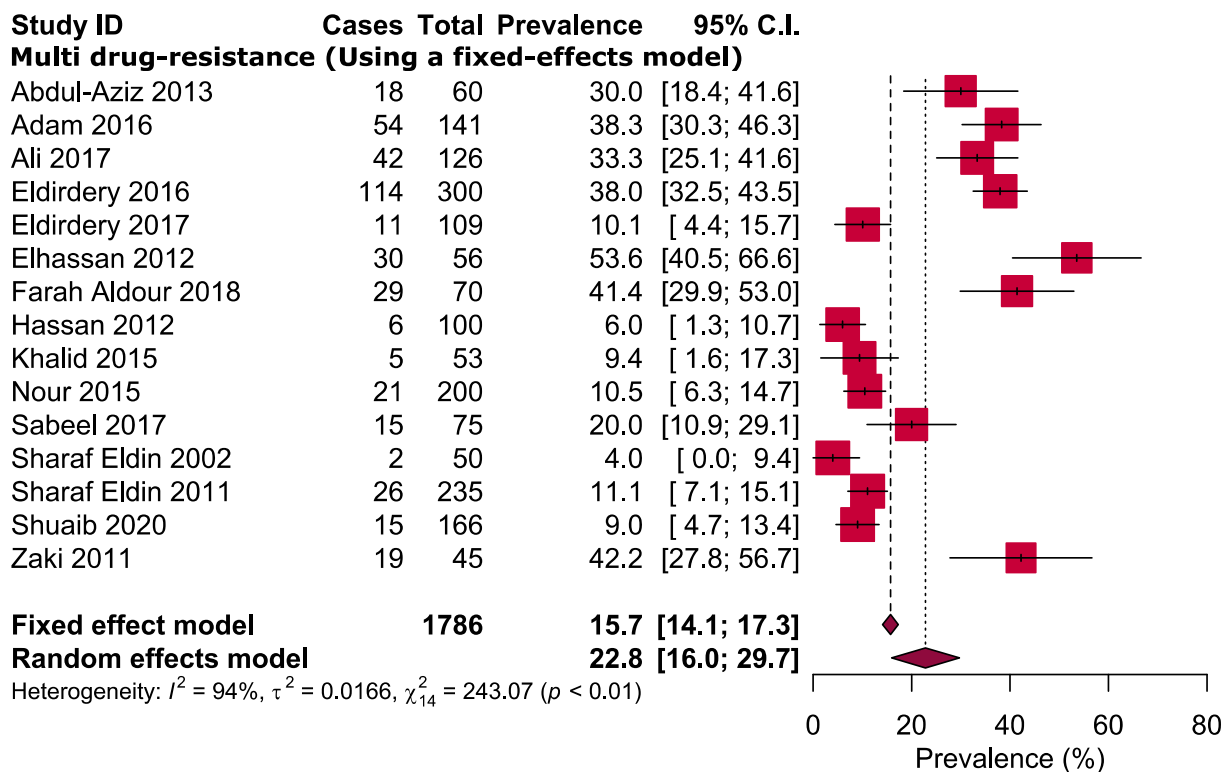

N

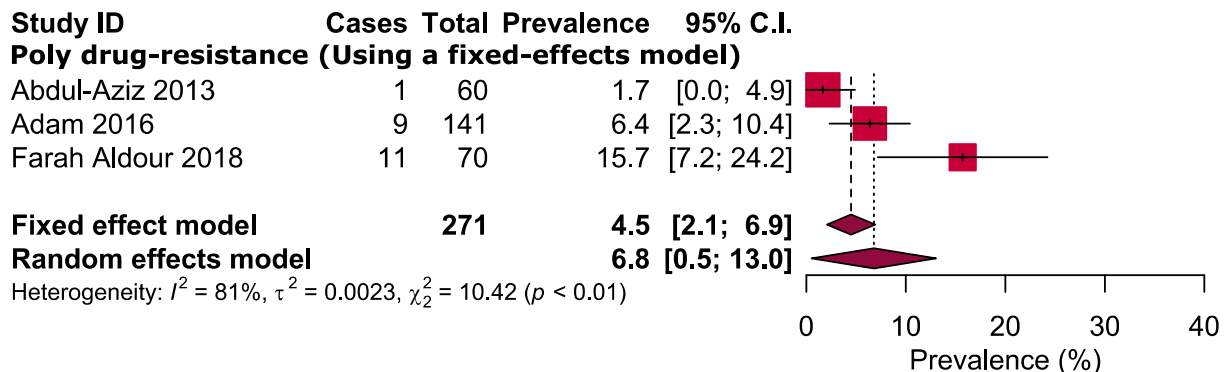

O

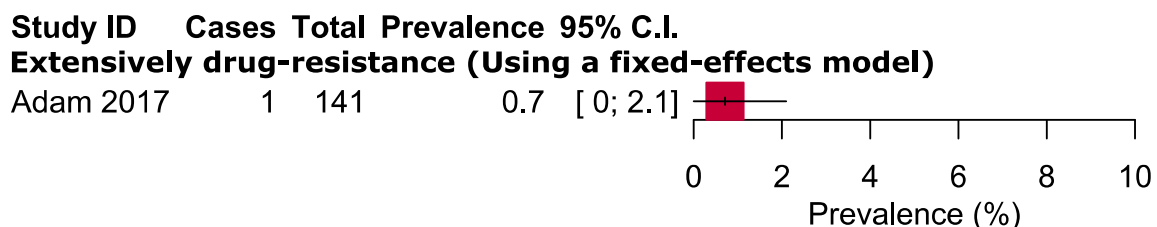

**Figure S6.** Sensitivity analyses: excluding small studies ( $n < 100$ ) from A to E; excluding moderate-quality studies from F to J and using a fixed-effects model from K to O.

**Table S1.** Quality assessment of the included cross-sectional studies.

| No. | Study ID          | Questions assessing included cross-sectional studies |   |   |   |   |   |   |   | Yes (%) |
|-----|-------------------|------------------------------------------------------|---|---|---|---|---|---|---|---------|
|     |                   | 1                                                    | 2 | 3 | 4 | 5 | 6 | 7 | 8 |         |
| 1   | Abdul-Aziz 2013   | Y                                                    | Y | Y | Y | N | N | Y | Y | 75.0    |
| 2   | Adam 2017         | Y                                                    | Y | Y | Y | N | N | Y | Y | 75.0    |
| 3   | Adam 2016         | Y                                                    | Y | Y | Y | N | N | Y | Y | 75.0    |
| 4   | Ali 2017          | Y                                                    | Y | Y | Y | N | N | Y | Y | 75.0    |
| 5   | Eldirdery 2017    | Y                                                    | Y | Y | Y | Y | N | Y | Y | 87.5    |
| 6   | Eldirdery 2016    | Y                                                    | Y | Y | Y | N | N | Y | Y | 75.0    |
| 7   | Farah Aldour 2018 | Y                                                    | Y | Y | U | N | N | Y | Y | 62.5    |
| 8   | Elhassan 2012     | Y                                                    | Y | Y | Y | N | N | Y | Y | 75.0    |
| 9   | Hassan 2012       | Y                                                    | Y | Y | Y | N | N | Y | Y | 75.0    |
| 10  | Khalid 2015       | Y                                                    | Y | Y | Y | N | N | Y | N | 62.5    |
| 11  | Nour 2015         | Y                                                    | Y | Y | Y | N | N | Y | N | 62.5    |
| 12  | Sabeel 2017       | Y                                                    | Y | Y | Y | N | N | Y | Y | 75.0    |
| 13  | Sharaf Eldin 2011 | Y                                                    | Y | Y | Y | Y | U | Y | Y | 87.5    |
| 14  | Sharaf Eldin 2002 | Y                                                    | Y | Y | Y | N | N | Y | N | 62.5    |
| 15  | Shuaib 2020       | Y                                                    | Y | Y | Y | N | N | N | N | 50.0    |
| 16  | Zaki 2011         | Y                                                    | Y | Y | Y | Y | N | Y | N | 75.0    |

1. Were the criteria for inclusion in the sample clearly defined? 2. Were the study subjects and the setting described in detail? 3. Was the exposure measured in a valid and reliable way? 4. Were objective, standard criteria used for measurement of the condition? 5. Were confounding factors identified? 6. Were strategies to deal with confounding factors stated? 7. Were the outcomes measured in a valid and reliable way? 8. Was appropriate statistical analysis used? Y=Yes; N=No; U=Unclear.

**Table S2:** Search strategy

| Databases | Search strategy                                                                                                                                                                                                                                                                                                                                                                |
|-----------|--------------------------------------------------------------------------------------------------------------------------------------------------------------------------------------------------------------------------------------------------------------------------------------------------------------------------------------------------------------------------------|
| PubMed    | ((TB OR tuberculosis OR "Mycobacterium tuberculosis" OR anti-tuberculosis OR anti-TB OR anti-tubercular) AND (isoniazid OR rifampicin OR ethambutol OR pyrazinamide OR streptomycin OR amikacin OR kanamycin OR capreomycin OR viomycin OR enviomycin OR ciprofloxacin OR levofloxacin OR moxifloxacin OR ethionamide OR prothionamide OR seromycin OR terizidone OR rifabutin |

|                       |                                                                                                                                                                                                                                                                                                                                                                                                                                                                                                                                                                                                                                                                                                                                                                                                          |
|-----------------------|----------------------------------------------------------------------------------------------------------------------------------------------------------------------------------------------------------------------------------------------------------------------------------------------------------------------------------------------------------------------------------------------------------------------------------------------------------------------------------------------------------------------------------------------------------------------------------------------------------------------------------------------------------------------------------------------------------------------------------------------------------------------------------------------------------|
|                       | OR clarithromycin OR linezolid OR thioacetazone OR bedaquiline OR clofazimine OR rifapentine OR resistance OR resistant OR susceptibility OR sensitivity OR drug-resistant OR drug resistance OR multidrug-resistant tuberculosis)) AND (Sudan OR Khartoum OR Kordofan OR Kassala OR Blue Nile OR Darfur OR Gezira OR White Nile OR River Nile OR Red Sea OR Al Qadarif OR Sennar)                                                                                                                                                                                                                                                                                                                                                                                                                       |
| <b>Scopus</b>         | TITLE-ABS-KEY(TB OR tuberculosis OR "Mycobacterium tuberculosis" OR anti-tuberculosis OR anti-TB OR anti-tubercular) AND TITLE-ABS-KEY(isoniazid OR rifampicin OR ethambutol OR pyrazinamide OR streptomycin OR amikacin OR kanamycin OR capreomycin OR viomycin OR enviomycin OR ciprofloxacin OR levofloxacin OR moxifloxacin OR ethionamide OR prothionamide OR seromycin OR terizidone OR rifabutin OR clarithromycin OR linezolid OR thioacetazone OR Bedaquiline OR clofazimine OR rifapentine OR resistance OR resistant OR susceptibility OR sensitivity OR drug-resistant OR drug resistance OR multidrug-resistant tuberculosis) AND AFFIL(Sudan OR Khartoum OR Kordofan OR Kassala OR "Blue Nile" OR Darfur OR Gezira OR "White Nile" OR "River Nile" OR "Red Sea" OR "Al Qadarif" OR Sennar) |
| <b>Web of Science</b> | ALL=(TB OR tuberculosis OR "Mycobacterium tuberculosis" OR anti-tuberculosis OR anti-TB OR anti-tubercular) AND ALL=(isoniazid OR rifampicin OR ethambutol OR pyrazinamide OR streptomycin OR amikacin OR kanamycin OR capreomycin OR viomycin OR enviomycin OR ciprofloxacin OR levofloxacin OR moxifloxacin OR ethionamide OR prothionamide OR seromycin OR terizidone OR rifabutin OR clarithromycin OR linezolid OR thioacetazone OR bedaquiline OR clofazimine OR rifapentine OR resistance OR resistant OR susceptibility OR sensitivity OR drug-resistant OR drug resistance OR multidrug-resistant tuberculosis) AND ALL=(Sudan OR Khartoum OR Kordofan OR Kassala OR Blue Nile OR Darfur OR Gezira OR White Nile OR River Nile OR Red Sea OR Al Qadarif OR Sennar)                              |
| <b>Google Scholar</b> | allintitle:(TB OR tuberculosis OR "Mycobacterium tuberculosis" OR anti-tuberculosis OR anti-TB OR anti-tubercular) (Sudan OR Khartoum OR Kordofan                                                                                                                                                                                                                                                                                                                                                                                                                                                                                                                                                                                                                                                        |

|  |                                                                                                                       |
|--|-----------------------------------------------------------------------------------------------------------------------|
|  | OR Kassala OR "Blue Nile" OR Darfur OR Gezira OR "White Nile" OR "River Nile" OR "Red Sea" OR "Al Qadarif" OR Sennar) |
|--|-----------------------------------------------------------------------------------------------------------------------|
